13 **Running Title:** Evaluating Sexually Antagonistic Variants in Humans

14

15 **Keywords:** sexually antagonistic selection, male-female  $F_{ST}$ , biobank, association study, probe  
16 mapping

17

18 **Corresponding Authors:**

19 John A. Capra

20 U5221 BSB/MRB III

21 VU Station B, Box 35-1634

22 Nashville, TN 37235

23 tony.capra@vanderbilt.edu

24 615-343-3671

25

26 Patrick C. Phillips

27 272 Onyx Bridge

28 5289 University of Oregon

29 Eugene, OR 97403

30 pphil@uoregon.edu

31 541-346-0916

32  
33  
34  
35  
36  
37  
38  
39  
40  
41  
42  
43  
44  
45  
46  
47  
48  
49  
50  
51

## ABSTRACT

Sex and sexual differentiation are ubiquitous across the tree of life. Because females and males often have substantially different functional requirements, we expect selection to differ between the sexes. Recent studies in diverse species, including humans, suggest sexually antagonistic viability selection creates allele frequency differences between the sexes at many different loci. However, theory and population-level simulations indicate that sex-specific differences in viability would need to be very extreme in order to produce and maintain reported levels of between-sex allelic differentiation. We address this paradox between theoretical predictions and empirical observations by evaluating evidence for sexually antagonistic viability selection on autosomal loci in humans using the largest cohort to date (UK Biobank, n=438,427) along with a second large, independent cohort (BioVU, n=93,864). We performed association tests between genetically ascertained sex and genotypes. Although we found dozens of genome-wide significant associations, none replicated across samples. Moreover, closer inspection revealed that all associations are likely due to cross-hybridization with sex chromosome regions during genotyping. We report loci with potential for mis-hybridization found on commonly used genotyping platforms that should be carefully considered in future genetic studies of sex-specific differences. Despite being well-powered to detect allele frequency differences of up to 0.8% between the sexes, we do not detect evidence for this signature of sexually antagonistic viability selection on autosomal variation. These findings suggest a lack of strong ongoing sexually antagonistic viability selection acting on single locus autosomal variation in humans.

52 **INTRODUCTION**

53 Understanding the relationship between genotype and sexually dimorphic phenotypes, and how  
54 selection shapes this relationship, is fundamental to understanding sex-specific responses in  
55 aging (Archer *et al.* 2018), fertility (Farquhar *et al.* 2019), disease susceptibility (Morrow 2015;  
56 Ferretti *et al.* 2018; Dumitrescu *et al.* 2019), and treatment (Khramtsova *et al.* 2018). Sexual  
57 dimorphism is common across a range of plant and animal taxa (Rowe *et al.* 2018; Deegan and  
58 Engel 2019). Differences in optimal fitness values between the sexes may result in sexually  
59 antagonistic selection (Arnqvist and Rowe 2005) – i.e., selection on autosomal variants that  
60 affect fitness in different directions for each sex. Surveys of natural selection suggest that the  
61 repeated evolution of sexual dimorphism is commonly associated with sexually antagonistic  
62 selection (Cox and Calsbeek 2009). Yet, we still lack an understanding of how this process  
63 shapes genomic variation within and between species. A major obstacle in assessing the  
64 genomic consequences of sexually antagonistic selection is that most of the hypothesized  
65 genomic signatures are not unique to this mode of selection. However, when the alleles at a  
66 single locus have opposite effects on viability between the sexes, namely intralocus sexual  
67 conflict (Rice and Chippindale 2001), then sexually antagonistic viability selection is  
68 hypothesized to favor different alleles in each sex. This process is predicted to generate allele  
69 frequency differences between the sexes among adults (Mank 2017; Kasimatis *et al.* 2017).

70 Recent research has looked for this signature of selection by identifying alleles with high  
71 male-female  $F_{ST}$  (Cheng and Kirkpatrick 2016; Kasimatis *et al.* 2017; 2019), a normalized  
72 measure of allele frequency difference. Such studies across a range of taxa have suggested  
73 that potentially hundreds of autosomal loci are subject to ongoing sexually antagonistic selection  
74 with many differentiated loci having male-female divergence values of at least 10% (Lucotte *et al.*  
75 *et al.* 2016; Flanagan and Jones 2017; Wright *et al.* 2018; Dutoit *et al.* 2018; Bissegger *et al.*  
76 2019), and some reaching even as high as 45% (Vaux *et al.* 2019). These results are surprising  
77 because the production and maintenance of such large male-female differences on autosomes  
78 requires strong, ongoing selection to overcome the homogenization of genotypes during meiotic  
79 segregation every generation (Cheng and Kirkpatrick 2016; Kasimatis *et al.* 2019). Theory  
80 suggests that a male-female  $F_{ST}$  value of 1% requires at least a 33% viability cost per sex per  
81 generation (Kasimatis *et al.* 2019). Given the high sex-specific viability cost, factors such as  
82 population structure, sampling variance due to small sample sizes, or bioinformatic artifacts may  
83 contribute to the high divergence values observed (Kasimatis *et al.* 2019). Of particular concern  
84 are the small sample sizes (15 to 100 individuals) used by many previous studies. Detecting the  
85 level of allelic differentiation expected at sexually antagonistic loci with moderate sex-specific

86 mortality ( $\leq 10\%$  per sex) requires substantially larger sample sizes and accounting for other  
87 possible confounding effects, such as population structure (Kasimatis *et al.* 2019). Indeed, a  
88 meta-analysis of 51 studies that included more than 100,000 European-ancestry individuals did  
89 not find any common variants associated with sex ratio (Boraska *et al.* 2012).

90 We aim to reconcile empirical observations with theoretical predictions using a robust  
91 statistical framework to identify intralocus sexually antagonistic viability selection in the largest  
92 human cohort to date. We use two large-scale biobanks, the UK Biobank and the Vanderbilt  
93 Biobank (BioVU) to analyze >500,000 human genomes for signals of male-female divergence  
94 driven by sexually antagonistic selection. We rigorously control for population stratification and  
95 potential molecular and informatic artifacts. Compared to previous studies examining sexual  
96 antagonism, these datasets significantly improve our statistical power to detect allele frequency  
97 differences among the sexes by providing the largest available sample sizes to date – several  
98 orders greater than previous studies in humans (Lucotte *et al.* 2016; Cheng and Kirkpatrick  
99 2016) and non-model taxa (Lucotte *et al.* 2016; Flanagan and Jones 2017; Wright *et al.* 2018;  
100 Dutoit *et al.* 2018; Bissegger *et al.* 2019; Vaux *et al.* 2019). Our association framework differs  
101 from traditional association studies as genetic sex is the phenotype of interest and the  
102 mechanism generating a true effect would be sex-specific viability. After controlling for multiple  
103 confounders, we are unable to detect evidence for ongoing sexually antagonistic viability  
104 selection at individual autosomal loci.

105

106

## MATERIALS AND METHODS

### 107 **Genotyping and quality control in BioVU**

108 The DNA biobank at Vanderbilt University, consists of DNA extracted from blood collected  
109 during routine clinical testing. For 93,864 individuals, GWAS-level genotyping was performed  
110 using the Illumina MEGA-Ex chip which includes >2 million common and rare variants before  
111 imputation. We obtained genotyped data in PLINK format from the Vanderbilt sequencing core  
112 after the following quality control steps: excluding either samples or variants with  $\geq 5\%$   
113 missingness, mismatched identifiers as detected by identity by descent checks, and non-  
114 concordance between reported gender and genetically determined sex. Overlapping variants  
115 with 1000 Genomes demonstrated  $\geq 99.98\%$  variant call concordance using HapMap sample  
116 aliquots. Using PLINKv1.90b3s (Chang *et al.* 2015), we additionally performed the following  
117 quality control steps. We first confirm that duplicate samples and those with high missing rate  
118 ( $\geq 5\%$ ) are not present and exclude samples with high heterozygosity on autosomes ( $> 3$  S.D.

119 from observed data), or high relatedness ( $\%IBD \geq 0.2$ ). Next, we removed duplicated variants  
120 and variants with high missing rate ( $\geq 5\%$ ) or significantly different missing rate between cases  
121 and controls ( $p < 0.00001$ , Fisher's Exact test). We then included only samples with a self or  
122 third party reported race as 'white' and variants with minor allele frequency  $>0.01$ . This  
123 additional quality control resulted in a final European-ancestry dataset of 61,760 samples  
124 (34,269 females and 27,491 males) and 1,763,607 variants. We calculated the top 12 principal  
125 components on this cohort. We imputed variants that reached nominal or genome-wide  
126 statistical significance ( $P < 5E-8$ ) in the UK Biobank data but were not genotyped in the BioVU  
127 cohort. These variants were imputed using the Michigan Imputation Server (v1.2.4) (Das *et al.*  
128 2016) using the HRC (Version r1.1 2016) reference panel and retaining variants with  $R^2 > 0.3$ .  
129 Imputed allele dosages were converted to hard calls using PLINK/2.00-alpha2 (Chang *et al.*  
130 2015) and filtered to exclude variants with minor allele frequency  $<1\%$  and genotyping rate  
131  $<95\%$ . All PLINK code is available on the GitHub repository [https://github.com/abraham-](https://github.com/abraham-abin13/sexually_antagonistic_sel.git)  
132 [abin13/sexually\\_antagonistic\\_sel.git](https://github.com/abraham-abin13/sexually_antagonistic_sel.git).

### 133 **Genotyping and quality control in the UK Biobank**

134 The UK Biobank is an international health resource with data from approximately 500,000  
135 participants. Genotyping and quality control procedures have previously been described in detail  
136 by Bycroft *et al.* (2018). Briefly, two arrays – the UK Biobank Axiom Array ( $n = 438,427$   
137 participants) and the UK BiLEVE Axiom Array ( $n = 49,950$  participants) – were used to genotype  
138 participants (71 bp oligos). Quality control procedures carried out before the data were released,  
139 included: removal of participants with excess heterozygosity or missingness, removal of  
140 markers with batch, plate, array, or sex effects, and removal of markers with discordance across  
141 control replications (Bycroft *et al.* 2018). The removal of sex effects, namely allele frequency  
142 differences between females and males at a given marker, does not preclude our analysis as  
143 the conservative threshold ( $P < 10E-12$ ) removed only eight markers and the sex differences at  
144 these markers were due to technical artifacts, such as the probe sequence mapping to the Y  
145 chromosome (C. Bycroft pers. comm.). The released genotype data contains 805,462 markers  
146 from 488,377 participants (Field IDs 22100-22124). Additionally, the genetic sex (Field ID  
147 22001), year of birth (Field ID 34), date of assessment (Field ID 53), and assessment center  
148 (Field ID 54) were requested for each participant. The top 40 genetic principal components  
149 (Field ID 22009) were previously calculated using fastPCA (Bycroft *et al.* 2018).

150 Using PLINKv1.90b3s (Chang *et al.* 2015), we additionally performed the following  
151 quality control steps. We excluded samples with high missing rate ( $\geq 5\%$ ) and high  
152 heterozygosity on autosomes ( $>3$  S.D. from observed data). Next, we pruned markers in

153 linkage-disequilibrium (window size = 50kb, step rate = 5,  $r^2$  threshold = 0.2). Finally, we  
154 removed variants with significantly different missing rate between cases and controls ( $P <$   
155 0.00001, Fisher's Exact test). We included only variants with minor allele frequency  $> 0.01$  to  
156 exclude inaccurate calls made for low frequency alleles (Wright *et al.* 2019; Weedon *et al.*  
157 2019). This additional quality control resulted in a final dataset of 488,291 samples (264,813  
158 females and 223,478 males) and 653,632 variants. A binomial test was used to test for a lack of  
159 minor allele homozygotes relative to that expected under HWE (this is conservative, because  
160 most human population dynamics is expected to lead to an excess of homozygosity). All PLINK  
161 code is available on the GitHub repository [https://github.com/abraham-](https://github.com/abraham-abin13/sexually_antagonistic_sel.git)  
162 [abin13/sexually\\_antagonistic\\_sel.git](https://github.com/abraham-abin13/sexually_antagonistic_sel.git)

163 Imputed genotype and phased haplotype values were used to compare significant loci in  
164 the BioVU cohort, which were not directly genotyped in the UK BIOBANK arrays. Again,  
165 imputation was completed prior to the data release using the Haplotype Reference Consortium  
166 and UK10K haplotype resource. The imputation methods are described in detail in Bycroft *et al.*  
167 (2018). Imputed allele dosages were converted to hard calls using PLINK/2.00-alpha2 (Chang  
168 *et al.* 2015).

### 169 **Genome-wide association for an individual's sex**

170 We performed a GWAS in UK Biobank and BioVU separately using a logistic regression testing  
171 the association between an individual's sex (binary variable, concordant with their genetic sex)  
172 and the effect allele, defined as the minor allele by PLINKv1.90b3s (Chang *et al.* 2015), using  
173 an additive model. For BioVU analysis, we controlled for genetic ancestry using 12 genetic  
174 principal components and included year of birth as a covariate. For the UK Biobank analysis, we  
175 again controlled for genetic ancestry using 12 genetic principal components, along with age at  
176 assessment and UK Biobank sampling center as covariates. All genome wide association tests  
177 were done using PLINKv1.90b3s (Chang *et al.* 2015). We focused our analyses on the  
178 autosomes, where genomic divergence between the sexes is not confounded by sex  
179 chromosome processes. During our quality control steps before association testing, we did not  
180 remove variants based on deviations from Hardy Weinberg Equilibrium (HWE) since theory  
181 indicates that sex-specific selection can violate the assumptions of HWE (Kasimatis *et al.* 2019).

### 182 **Resampling of sex and generating a null distribution**

183 To determine if p-values were well calibrated (i.e., uniformly distributed on  $[0,1]$ ) at non-  
184 associated variants, we performed a permutation analysis to calculate the distribution of p-  
185 values within the UK Biobank cohort. We resampled genetic sex 100 times per chromosome to

186 generate a set of random associations between genotype and this phenotype. We then reran  
187 the logistic regression, again including 12 genetic principal components, age, and sampling  
188 center as covariates, for only those variants that had a p-value < 0.01 in the original association  
189 analysis (n = 8,868 SNPS). These analyses generated a distribution of 100 p-values at each  
190 variant. Permuted p-values were uniformly distributed (Supplementary Figure 1A), even when  
191 the values were small (Supplementary Figure 1B), indicating the p-values for this association  
192 analysis were well-calibrated and therefore a genome-wide Bonferroni significance threshold of  
193  $P < 5E-8$  was appropriate. All R and PLINK code are available on the GitHub repository  
194 [https://github.com/abraham-abin13/sexually\\_antagonistic\\_sel.git](https://github.com/abraham-abin13/sexually_antagonistic_sel.git).

### 195 **Identifying SNPs with sequence similarity to sex chromosomes**

196 Incorrectly mapped sex-chromosome variants to an autosomal region can result in statistically  
197 significant GWAS hits for an individual's sex due to the different effects on allele counts  
198 between females and males. We used BLAT (Kent 2002) with default parameters (stepSize=5,  
199 repMatch=2253, minScore=20, minIdentity=0) to identify sequence similarity between the probe  
200 sequences used on the genotyping array and sex chromosome regions. The MEGA-Ex array  
201 probe sequences used to genotype the BioVU cohort were obtained directly from Illumina.  
202 Probes sequence for the UK Axiom Biobank array (Resource 149601) and UK BiLEVE array  
203 (Resource 149600) were download from <https://biobank.ctsu.ox.ac.uk/crystal/label.cgi?id=263>.  
204 MEGA-Ex probes are 50 base pair sequences adjacent to the variant being tested; MEGA-Ex  
205 uses single base extension to detect the variant allele. UK Biobank array probes are 71 base  
206 pairs long with the variant being genotyped located in the middle. BLAT hits to the X or Y  
207 chromosome were further filtered to identify regions likely to cross-hybridize by requiring at least  
208 40 base pair overlap, sequence similarity  $\geq 90\%$ , and that the matching sequence overlaps (UK  
209 Biobank arrays) or flanks (MEGA-Ex array) the variant being tested. Similar criteria were used in  
210 a previous a study that reported cross-hybridization on the Illumina Infinium  
211 HumanMethylation27K microarray platform (Chen *et al.* 2012). Next, we identified the best  
212 BLAT hit to a sex chromosome for each probe sequence by selecting the hit with the highest  
213 BLAT score, which accounts for match length and sequence similarity. For this step, we  
214 considered the UK Axiom and UK BiLEVE array together thus selecting the probe sequence  
215 with the highest BLAT score from one of the two arrays per variant tested in the GWAS. In the  
216 BioVU (MEGA-Ex array) and UK Biobank arrays, 83,083 out of 798,051 and 128,090 out of  
217 620,040 autosomal probes had at least one BLAT match (BLAT score  $\geq 20$ ) to a sex  
218 chromosome region. To further focus on sequence similarity with potential to cause genotyping  
219 error, we identified sex chromosome matches with the following criteria (Chen *et al.* 2012): 1)



220  $\geq 40$  base pairs in length, 2)  $\geq 90\%$  sequence similarity, and 3) overlap between the match and  
221 the variant being genotyped.

222

### 223 **Power Analysis**

224 We conducted a power analysis to determine how the minimum allelic divergence between the  
225 sexes that could be detected within the BioVU and UK Biobank cohorts (Supplemental File 9).  
226 Specifically, we determined the probability that we would reject the null observation that the  
227 population frequency of each allele is equal at a p-value threshold of  $P = 1E-8$ . Suppose we  
228 have  $N$  males and  $M$  females, and the allele frequencies in the two groups are  $P$  and  $Q$ . Since  
229 the cohort sample sizes are large, if the population frequencies are  $p$  and  $q$ , then  $P \sim \text{Normal}(p, p(1-p)/2N)$   
230 and  $Q \sim \text{Normal}(q, q(1-q)/2M)$ . The difference in population allele frequencies is  
231 then given by  $P - Q \sim \text{Normal}(p - q, p(1-p)/2N + q(1-q)/2M)$ . The variance is maximized  
232 when  $p = q = 1/2$ , so is at most the variance in the population is:  $V = (1/N + 1/M)/8$ . The two-  
233 sided p-value for  $P - Q$  being nonzero will be below  $1E-8$  if  $|P - Q|$  is larger than  $z(0.5e-8) * \text{sqrt}(V)$ ,  
234 where  $z(p)$  is the p-th quantile for the standard Normal distribution. Even, then, an allele with  $|P -$   
235  $Q| = z(0.5E-8) * \text{sqrt}(V)$  will only have a two-sided p-value half the time; alleles must be slightly  
236 farther apart (by  $z(0.025) * \text{sqrt}(V)$ ) to have a 95% probability that statistical noise does not put  
237 them above the  $p=1e-8$  threshold. Therefore, we will have 95% power to detect any SNP with  
238 true  $|p - q| > (z(0.5E-8) + z(0.025)) * \text{sqrt}(V)$ .

239

### 240 **Data Accessibility**

241 All the data generated from this study (Supplemental Files 1-9) were deposited in the figshare  
242 repository <https://figshare.com/s/e863ea11cc9dab30c1b9> to be made public upon publication.  
243 All the code generated for this study were deposited in a GitHub repository to be made public  
244 upon publication.

245

246

## 246 **RESULTS**

247 Throughout this paper when we refer to an individual's sex, we are referencing that individual's  
248 sex chromosome composition as estimated in each biobank dataset and binarized (i.e.,  
249 metadata reports each individual as XY or XX, although the datasets almost certainly include  
250 individuals not falling into these two categories (Lanfranco *et al.* 2004)). We make no  
251 statements in relation to gender, which is determined by many factors beyond genetics.

252

253 **Seventy-seven variants show genome-wide significance as candidates for sexually**  
254 **antagonistic selection**

255 To identify autosomal variants that could be under sexually antagonistic selection, we performed  
256 a genome-wide association study (GWAS) between females and males in two large,  
257 independent cohorts (BioVU: 34,269 females and 27,491 males; UK Biobank: 264,813 females  
258 and 223,478 males). We first applied standard quality control steps to remove samples with high  
259 relatedness, discordant sex, or high heterozygosity and excluded genotyped variants with high  
260 overall missing rate (Methods). We account for potential confounders by including age and 12  
261 principal components for population stratification as covariates. The resulting p-values are well-  
262 calibrated, as verified by permuting the sex labels in the UK Biobank cohort (Supplementary  
263 Figure 1A), and so the standard genome-wide significance threshold of  $P < 5E-8$  is appropriate  
264 for the association analysis (Methods, Supplementary Figure 1B). Applying this threshold  
265 resulted in five and 72 genome-wide significant variants in BioVU and UK Biobank, respectively.

266 Since different amount of missing data for each variant between cases and controls can  
267 lead to spurious associations (Moskvina *et al.* 2006), we tested variants for a statistically  
268 significant difference in the missing rate between females and males (Methods). This control  
269 excluded what would have been 64 genome-wide significant variants in the UK Biobank and  
270 none in the BioVU cohort (Supplemental Figure 2, Supplementary File 1), leaving us with eight  
271 and five variants in the two datasets, respectively (Figure 1, Table 1). One intriguing genome-  
272 wide significant variant in the UK Biobank cohort, (rs11032483; OR = 1.25,  $P < 1.3E-53$ ), which  
273 lies in a known regulatory region on chromosome 11 and has evidence from association studies  
274 for increasing risk in males and being protective in females for a number of sex-specific  
275 reproductive pathologies (Cortes *et al.* 2018).

276

277 **No candidate loci replicate across BioVU and the UK Biobank**

278 Comparing the five autosomal significant hits from BioVU to the eight from the UK Biobank,  
279 none of the associations are genome-wide significant in both cohorts (Table 1). Furthermore,  
280 none of the significant hits in one cohort even meet a nominal significance threshold ( $P < 0.05$ )  
281 in the other cohort. For example, the variant with the strongest association in the UK Biobank  
282 cohort (rs11032483) had no evidence for association with sex in the BioVU cohort ( $P = 0.99$ ).

283 The regions surrounding each of the significant variants do not exhibit the expected  
284 association signal clusters arising from variants in strong linkage disequilibrium (LD) with the  
285 causal variant. For example, the most strongly associated variant overall (rs9870157) has 33

286 variants with  $R^2$  of at least 0.8 in the 1000 Genomes Phase 3 European-ancestry (EUR)  
287 populations. However, there are no other strong associations among these variants. The lack of  
288 replication across the two cohorts and the missing association peaks among variants in strong  
289 LD suggest that these signals could be false positives driven by technical or biological artifacts.

290

### 291 **Significant associations are likely due to mis-hybridization with sex chromosome regions**

292 Genotyping error can occur due to probe cross-reactivity between different regions of the  
293 genome. Sex-biased error has been observed in array-based studies of DNA methylation (Chen  
294 *et al.* 2013) and has been reported in the canid genome (Tsai *et al.* 2019), the stickleback  
295 genome (Bisseger *et al.* 2019), and on the Y chromosome in humans (Boraska *et al.* 2012;  
296 Lucotte *et al.* 2016). For instance, if an autosomal variant is assayed with a probe sequence that  
297 has sufficient sequence similarity to a Y chromosome region carrying the reference allele, then  
298 males homozygous for the alternate allele at the autosomal locus may instead be genotyped as  
299 heterozygous for the alternate allele. Females would not be subject to this bias, and thus there  
300 would appear to be an allele frequency difference between the sexes. Similarly, an autosomal  
301 variant with a probe sequence with high similarity to the X chromosome could result in a lack of  
302 homozygotes for the allele not on the X chromosome in both sexes, but the strength of this  
303 effect would differ between females and males. Furthermore, such cross-reactivity can lead the  
304 normalized intensities produced by genotyping arrays to lie outside of the regions corresponding  
305 to each genotype, and thus a missing genotype (Zhao *et al.* 2018). Cross reactivity to a sex  
306 chromosome could therefore cause a differential missingness rate between the sexes. Indeed,  
307 we observe an almost complete lack of minor allele homozygotes in males across all thirteen  
308 genome-wide significant SNPs, as well as for females in all but four genome-wide significant  
309 SNPs (Supplemental Table 1). The same explanation is likely behind the 64 SNPs discarded for  
310 association between missingness and sex, as 26 of these SNPs have almost no male minor  
311 allele homozygotes and 47 have a p-value for lack of minor allele homozygotes of less than  $1E-$   
312 6.

313 To quantify the potential for mis-hybridization of sex chromosome regions to autosomal  
314 probes, we used BLAT (Kent 2002) to find all regions across the genome with high sequence  
315 similarity to autosomal probe sequences on the MEGAEx (BioVU) and UK Axiom/BilEVE (UK  
316 Biobank) genotyping arrays (Methods). We assign each probe sequence to the sex  
317 chromosome region with the highest BLAT score.

318 The probes for each significantly associated variant have high sequence similarity to a  
319 sex chromosome region (Figure 2, Table 2). In contrast, the majority of probes (79% in UK

320 Biobank, 89% in BioVU) do not have any detectable similarity (BLAT score < 20) to a sex  
321 chromosome sequence. Compared to the distribution of BLAT scores for probes with a match to  
322 a sex chromosome region, all genome-wide significant variants had BLAT scores greater than  
323 the 99th and 95th percentile for BioVU and UK Biobank respectively (inset Figure 2A, 2B).  
324 Using a stricter criteria to define potential sex chromosome sequence similarity (Methods), we  
325 find that all genome-wide significant variants in BioVU (Supplemental Figure 3A) and six out of  
326 eight genome-wide significant variants in UK Biobank (Supplemental Figure 3B) still have strong  
327 sequence similarity to a sex chromosome region (Table 2). Only 0.57% (4,587 probes) and  
328 3.3% (20,528) of all probes in BioVU and UK Biobank respectively have such a sex  
329 chromosome match (Supplemental Figure 3). The difference in percentage is likely due to the  
330 UK Biobank arrays having longer probe sequences. Probes of genome-wide significant variants  
331 have similar BLAT matching properties as non-significant probes (Supplementary Figure 4) in  
332 UK Biobank and BioVU. Many of the 64 SNPs discarded for between-sex differences in  
333 missingness also demonstrated high sequence similarity to sex chromosome regions  
334 (Supplementary Table 8). Overall, the lack of homozygotes and the high sequence similarity  
335 between significant probes and sex chromosomes strongly suggests that sex-specific  
336 genotyping error is the source of the significant associations rather than sexually antagonistic  
337 selection.

338

### 339 **The lack of sex-specific allele frequency differences is not due to being statistically** 340 **underpowered**

341 To determine if the lack of significant associations might be a result of being underpowered to  
342 detect plausible effect sizes, we conducted a power analysis (Methods). Based on the large  
343 cohort sizes, we have 95% power to detect a variant with a true allele frequency difference  
344 greater than 2% between the sexes in the BioVU cohort and greater than 0.8% in the UK  
345 Biobank (Figure 3A). A frequency difference of  $f\%$  caused by sex-specific antagonistic selection  
346 at a locus requires a mortality of roughly  $f/2\%$ , so we should be able to detect segregating  
347 variants with sex-specific mortality effects of at least 0.4% (Supplemental File 9). For  
348 comparison, a cohort of 100 individuals, as used in a previous HapMap study (Lucotte *et al.*  
349 2016), only has 95% power to detect allele frequency differences between the sexes of 38% or  
350 greater (Figure 3B).

351

352

## DISCUSSION

353 Understanding how sex-specific effects are transmitted by autosomal variation is critical for  
354 understanding how sexual dimorphisms arise and fix in populations. Sexually antagonistic  
355 selection maintains sexual dimorphisms and is predicted to be a pervasive driver of genome  
356 evolution (Rowe *et al.* 2018). Yet, empirically, the genomic signature of this process is not well  
357 characterized. In this study, we sought to identify the extent of one genomic signature of  
358 sexually antagonistic viability selection acting on autosomal variation in human populations.  
359 Capitalizing on two of the largest available biobanks, we performed genome-wide association  
360 tests for genetic sex that failed to identify and replicate any genome-wide significant variants.  
361 On closer inspection, a number of promising genome-wide significant variants were driven by  
362 technical artifacts, most likely due to high sequence similarity to a sex chromosome. We  
363 conclude there is no conclusive signal in these data of sexually antagonistic viability selection  
364 acting on genetic variants at individual loci based on a male-female divergence statistic.

365 These results stand in contrast to recent male-female  $F_{ST}$  studies, that have reported  
366 tens to hundreds of significantly differentiated variants (Lucotte *et al.* 2016; Flanagan and Jones  
367 2017; Wright *et al.* 2018; Dutoit *et al.* 2018; Bissegger *et al.* 2019; Vaux *et al.* 2019). These  
368 studies suggest strong, pervasive sexually antagonistic viability selection acting across the  
369 genomes of various species, which would be puzzling in light of theoretical observations and  
370 simulations indicating that strong allelic divergence between the sexes requires high sex-  
371 specific mortality rates to overcome the homogenizing effect of meiotic segregation occurring  
372 every generation (Kasimatis *et al.* 2019). In contrast to these studies, the sample size of our  
373 study provided statistical power to distinguish true signal of plausible magnitude from stochastic  
374 noise. Additionally, our use of larger sample sizes provided power to detect smaller allelic  
375 divergence between the sexes – within the range predicted to be generated by weak sexually  
376 antagonistic selection. Our results are in line with a previous meta-analysis of sex-specific  
377 common variant differences in humans (Boraska *et al.* 2012), though our direct, replicated  
378 approach with larger sample sizes mitigates against potential confounders across different  
379 studies.

380 We found strict quality control measures for population structure and multiple testing  
381 essential. In particular, rigorous testing for sequence similarity to the sex chromosomes showed  
382 that all significant SNPs had strong sequence matches. The potential for high sequence  
383 similarity between autosomes and sex chromosomes to generate sex-biased genotyping errors  
384 has been reported previously (Chen *et al.* 2012; 2013). However, the potential for these sex  
385 chromosome artifacts to affect population genetic statistics has not been fully appreciated until

386 recently (Bissegger *et al.* 2019; Tsai *et al.* 2019) or has only been examined for the Y  
387 chromosome (Lucotte *et al.* 2016). In particular, probe sequences with high sequence similarity  
388 to one the sex chromosomes can lead to skewed allele frequency estimates in a sex-specific  
389 manner due to sequence mis-hybridization and the different sex chromosome content between  
390 females and males. This problem extends beyond SNP-based genotyping to read-based  
391 sequencing data, where inaccurate mapping of reads to an autosome instead of the sex  
392 chromosome could generate a similar skew in allele frequencies. This sex chromosome effect is  
393 potentially very common, and therefore, must be explicitly considered in any sex-specific or sex-  
394 stratified analyses to prevent technical and bioinformatic artifacts from generating false signals.  
395 Participation bias rather than differential mortality can also generate a signal of male-female  
396 divergence (Pirastu *et al.* 2020), though this source of error is not relevant in this study since we  
397 did not find candidate SNPs for sexually antagonistic selection that passed our quality controls.  
398 Such artifacts will be especially problematic in species with new sex chromosomes, poorly  
399 assembled genomes, or rapidly evolving sex chromosome systems. In our case, filtering out  
400 SNPs with large differences in missingness between sexes and/or lack of homozygotes was  
401 sufficient to remove problematic SNPs.

402         Comparison of sequence similarity and match length for all probes indicates that  
403 thousands of other probes have similarly strong sex chromosome matches as the candidate  
404 variants analyzed here (Supplementary Figure 2). While previous studies have detected similar  
405 hybridization effects (Chen *et al.* 2012; 2013), the extent to which they can skew association  
406 results has not yet been reported on the UKBiobank and BioVU arrays. This high sequence  
407 similarity could suggest that more variants should show false positive signatures of sex-specific  
408 allele frequency differences. However, multiple factors contribute to the potential for mis-  
409 hybridization and inaccurate genotyping. For example, hybridization strength and kinetics are  
410 determined by sequence attributes beyond simple sequence identity, including local GC content  
411 and the potential for DNA secondary structures to form (Zhang *et al.* 2018). Furthermore, the  
412 sequence region matched on the sex chromosome (i.e., pseudo-autosomal versus non-  
413 recombining) also matters. It is also likely that different quality control strategies used on  
414 different genotyping array platforms filter different problematic sites.

415         Although sexually antagonistic selection is certainly an important selective pressure, we  
416 see no evidence of it generating substantial autosomal allelic divergence between the sexes in  
417 human populations. This strong negative result is unusual, as genome-wide association studies  
418 for most traits on a biobank-scale find significantly associated SNPs. We know that humans  
419 have the opportunity for sexually antagonistic effects, as seen through sex-specific mortality and

420 disease susceptibility (Morrow 2015; Khramtsova *et al.* 2018). However, randomization of  
421 alleles every generation by meiotic segregation means that a large selective pressure is  
422 required to create a large difference in allele frequencies, and thus, this genetic process makes  
423 it harder to detect the results of sexually antagonistic selection. Furthermore, some sexually  
424 antagonistic variants are not stably polymorphic; we would not detect these because they move  
425 rapidly to fixation (Rowe *et al.* 2018; Kasimatis *et al.* 2019).

426         Given the confounding factors, technical artifacts, and high sampling variance,  
427 identifying variants with small sex-specific effect sizes is a formidable challenge. We strongly  
428 recommend that future studies avoid simple metrics, like the male-female  $F_{ST}$ , and instead  
429 incorporate strict quality filters and control for known confounders into their association tests.  
430 Sexually antagonistic viability selection is not the only action of sex-specific selection nor is  
431 male-female allelic divergence at a single locus the only possible signature of sexual  
432 antagonism. Given the extent of sexual dimorphisms in nature, there are almost surely  
433 autosomal loci subject to sexually antagonistic selection, which may be detectable through other  
434 genomic signatures. However, our work illustrates that the field must reconsider our  
435 assumptions and develop new metrics for identifying signatures of sexual antagonism in the  
436 light of theoretical expectations to understand how this process affects the genome. Such  
437 studies will help us understand the translation of sex across the genotype-phenotype map and  
438 apply this to human health.

439

#### 440 **Acknowledgements**

441 We thank Locke Rowe and the Phillips and Capra lab groups for their comments on this work,  
442 as well as Clare Bycroft, Adrián Cortés, and Gil McVean for information about UK Biobank  
443 genotyping. A.K. was supported by NIH award R01GM117241. J.A.C. was supported by NIH  
444 award R35GM127087. P.C.P. was supported by NIH award R01GM102511 and  
445 R35GM131838. A.A. is supported by NIGMS of the National Institutes of Health under award  
446 number T32GM007347. This research has been conducted using the UK Biobank Resource  
447 under Application Number 43626. This work was conducted in part using the resources of the  
448 Advanced Computing Center for Research and Education at Vanderbilt University and the  
449 resources of the Research Advanced Computing Services at the University of Oregon. The  
450 content is solely the responsibility of the authors and does not necessarily represent the official  
451 views of the National Institutes of Health.

452

453 Contributions

454 K.R.K. and P.C.P. devised the project. K.R.K., A.A., P.L.R., A.D.K., J.A.C., and P.C.P. designed  
455 the analyses. K.R.K. and A.A. performed analyses. K.R.K., A.A., P.L.R, and J.A.C wrote the  
456 manuscript with the support of the other authors.

457

458 The authors declare no competing interests.

459

460



461 **REFERENCES**

- 462 Archer C. R., Recker M., Duffy E., Hosken D. J., 2018 Intralocus sexual conflict can resolve the  
463 male-female health-survival paradox. *Nat. Commun.* **9**: 1–7.
- 464 Arnqvist G., Rowe L., 2005 *Sexual conflict*. Princeton University Press, Princeton, NY.
- 465 Bissegger M., Laurentino T. G., Roesti M., Berner D., 2019 Widespread intersex differentiation  
466 across the stickleback genome - The signature of sexually antagonistic selection? *Mol.*  
467 *Ecol.* **77**: 1–10.
- 468 Boraska V., Jeroncic A., Colonna V., Southam L., Nyholt D. R., *et. al.*, 2012 Genome-wide  
469 meta-analysis of common variant differences between men and women. *Hum. Mol. Genet.*  
470 **21**: 4805–4815.
- 471 Bycroft C., Freeman C., Petkova D., Band G., Elliott L. T., *et. al.*, 2018 The UK Biobank  
472 resource with deep phenotyping and genomic data. *Nature* **562**: 203–209.
- 473 Chang C. C., Chow C. C., Tellier L. C., Vattikuti S., Purcell S. M., *et. al.*, 2015 Second-  
474 generation PLINK: rising to the challenge of larger and richer datasets. *Gigascience* **4**: 2–  
475 16.
- 476 Chen Y.-A., Choufani S., Grafodatskaya D., Butcher D. T., Ferreira J. C., *et. al.*, 2012 Cross-  
477 Reactive DNA Microarray Probes Lead to False Discovery of Autosomal Sex-Associated  
478 DNA Methylation. *Am. J. Hum. Genet.* **91**: 762–764.
- 479 Chen Y.-A., Lemire M., Choufani S., Butcher D. T., Grafodatskaya D., *et. al.*, 2013 Discovery of  
480 cross-reactive probes and polymorphic CpGs in the Illumina Infinium HumanMethylation450  
481 microarray. *Epigenetics* **8**: 203–209.
- 482 Cheng C., Kirkpatrick M., 2016 Sex-specific selection and sex-biased gene expression in  
483 humans and flies. *PLoS Genetics* **12**: e1006170.
- 484 Cortes A., Dendrou C. A., Fugger L., McVean G., 2018 Systematic classification of shared  
485 components of genetic risk for common human diseases. *bioRxiv*: 1–22.
- 486 Cox R. M., Calsbeek R., 2009 Sexually antagonistic selection, sexual dimorphism, and the  
487 resolution of intralocus sexual conflict. *Am. Nat.* **173**: 176–187.
- 488 Das S., Forer L., Schönherr S., Sidore C., Locke A. E., *et. al.*, 2016 Next-generation genotype  
489 imputation service and methods. *Nat. Genet.* **48**: 1284–1287.
- 490 Deegan D. F., Engel N., 2019 Sexual dimorphism in the age of genomics: how, when, where.  
491 *Front. Cell. Dev. Biol.* **7**: 1–7.
- 492 Dumitrescu L., Barnes L. L., Thambisetty M., Beecham G., Kunkle B., *et. al.*, 2019 Sex  
493 differences in the genetic predictors of Alzheimer’s pathology. *Brain* **142**: 2581–2589.
- 494 Dutoit L., Mugal C. F., Bolívar P., Wang M., Nadachowska-Brzyska K., *et. al.*, 2018 Sex-biased  
495 gene expression, sexual antagonism and levels of genetic diversity in the collared flycatcher  
496 (*Ficedula albicollis*) genome. *Mol. Ecol.* **27**: 3572–3581.

- 497 Farquhar C. M., Bhattacharya S., Repping S., Mastenbroek S., Kamath M. S., *et. al.*, 2019  
498 Female subfertility. *Nat. Rev. Dis. Primers*. **5**: 1–22.
- 499 Ferretti M. T., Iulita M. F., Cavedo E., Chiesa P. A., Schumacher Dimech A., *et. al.*, 2018 Sex  
500 differences in Alzheimer disease - the gateway to precision medicine. *Nat. Rev. Neurol.* **14**:  
501 457–469.
- 502 Flanagan S. P., Jones A. G., 2017 Genome-wide selection components analysis in a fish with  
503 male pregnancy. *Evol.* **71**: 1096–1105.
- 504 Kasimatis K. R., Nelson T. C., Phillips P. C., 2017 Genomic signatures of sexual conflict. *J.*  
505 *Hered.* **108**: 780–790.
- 506 Kasimatis K. R., Ralph P. L., Phillips P. C., 2019 Limits to genomic divergence under sexually  
507 antagonistic selection. *G3* **9**: 3813–3824.
- 508 Kent W. J., 2002 BLAT - The BLAST-like alignment tool. *Genome Res.* **12**: 656–664.
- 509 Khramtsova E. A., Davis L. K., Stranger B. E., 2018 The role of sex in the genomics of human  
510 complex traits. *Nat. Rev. Genet* **62**: 1–190.
- 511 Lanfranco F., Kamischke A., Zitzmann M., Nieschlag E., 2004 Klinefelter's syndrome. *Lancet*  
512 **364**: 273–283.
- 513 Lucotte E. A., Laurent R., Heyer E., Ségurel L., Toupance B., 2016 Detection of allelic  
514 frequency differences between the sexes in humans: a signature of sexually antagonistic  
515 selection. *Genome Biol. Evol.* **8**: 1489–1500.
- 516 Mank J. E., 2017 Population genetics of sexual conflict in the genomic era. *Nat. Rev. Genet.* **7**:  
517 1–10.
- 518 Morrow E. H., 2015 The evolution of sex differences in disease. *Biol. Sex Differ.* **6**: 1–7.
- 519 Moskvina V., Craddock N., Holmans P., Owen M. J., O'Donovan M. C., 2006 Effects of  
520 differential genotyping error rate on the type I error probability of case-control studies. *Hum.*  
521 *Hered.* **61**: 55–64.
- 522 Pirastu N., Cordioli M., Nandakumar P., Mignogna G., Abdellaoui A., *et. al.*, 2020 Genetic  
523 analyses identify widespread sex-differential participation bias. *bioRxiv*: 1–54.
- 524 Rice W. R., Chippindale A. K., 2001 Intersexual ontogenetic conflict. *J. Evol. Biol.* **14**: 685–693.
- 525 Rowe L., Chenoweth S. F., Agrawal A. F., 2018 The genomics of sexual conflict. *Am. Nat.* **192**:  
526 274–286.
- 527 Tsai K. L., Evans J. M., Noorai R. E., Starr-Moss A. N., Clark L. A., 2019 Novel Y chromosome  
528 retrocopies in canids revealed through a genome-wide association study for sex. *Genes* **10**:  
529 320–11.
- 530 Vaux F., Rasmuson L. K., Kautzi L. A., Rankin P. S., Blume M. T. O., *et. al.*, 2019 Sex matters:  
531 otolith shape and genomic variation in deacon rockfish (*Sebastes diaconus*). *Ecol Evol* **27**:  
532 477–21.

- 533 Weedon M. N., Jackson L., Harrison J. W., Ruth K. S., Tyrrell J., *et. al.*, 2019 Assessing the  
534 analytical validity of SNP-chips for detecting very rare pathogenic variants: implications for  
535 direct-to-consumer genetic testing. *bioRxiv*: 696799.
- 536 Wright A. E., Fumagalli M., Cooney C. R., Bloch N. I., Vieira F. G., *et. al.*, 2018 Male-biased  
537 gene expression resolves sexual conflict through the evolution of sex-specific genetic  
538 architecture. *Evol. Letters* **215**: 403–10.
- 539 Wright C. F., West B., Tuke M., Jones S. E., Patel K., *et. al.*, 2019 Assessing the pathogenicity,  
540 penetrance, and expressivity of putative disease-causing variants in a population setting.  
541 *Am. J. Hum. Genet.* **104**: 275–286.
- 542 Zhang J. X., Fang J. Z., Duan W., Wu L. R., Zhang A. W., *et. al.*, 2018 Predicting DNA  
543 hybridization kinetics from sequence. *Nat. Chem.* **10**: 91–98.
- 544 Zhao S., Jing W., Samuels D. C., Sheng Q., Shyr Y., *et. al.*, 2018 Strategies for processing and  
545 quality control of Illumina genotyping arrays. *Brief Bioinform.* **19**: 765–775.  
546

547 **Table 1. Genome-wide significant variants in BioVU and UK Biobank cohorts.** Variants  
 548 passing genome-wide significance ( $P < 5E-8$ ) in the BioVU or UK Biobank cohorts are reported.  
 549 Genome-wide significant variants did not replicate across the cohorts. Location is reported in  
 550 GRCh37/hg19 coordinates. Allele refers to the effect allele with which odds ratio (OR) is  
 551 calculated. Individuals refers to the total number of individuals tested for the variant.  
 552

| Location<br>(chr:position)         | SNP ID      | Allele | Max.<br>OR | Individuals | BioVU<br>p-value | UK Biobank<br>p-Value |
|------------------------------------|-------------|--------|------------|-------------|------------------|-----------------------|
| <i>BioVU Significant SNPs</i>      |             |        |            |             |                  |                       |
| 3:16652240                         | rs9870157   | T      | 1.31       | 61,709      | 2.82e-83         | 0.42                  |
| 7:100351596                        | rs145369881 | T      | 0.78       | 60,499      | 3.25e-08         | 0.06                  |
| 7:121147858                        | rs77638744  | A      | 1.12       | 61,361      | 1.52e-10         | 0.13                  |
| 13:20119336                        | rs9508454   | C      | 1.19       | 61,694      | 1.26e-31         | 0.87                  |
| 14:35761675                        | rs1048990   | G      | 1.16       | 61,712      | 1.94e-20         | 0.75                  |
| <i>UK Biobank Significant SNPs</i> |             |        |            |             |                  |                       |
| 1:162075684                        | rs75745570  | T      | 0.92       | 471,060     | 0.66             | 7.60e-14              |
| 4:88457099                         | rs114928327 | T      | 0.89       | 413,257     | 0.30             | 4.09e-22              |
| 10:39006198                        | rs11598874  | T      | 1.07       | 478,329     | 0.44             | 1.94e-12              |
| 11:4515024                         | rs11032483  | T      | 1.25       | 482,581     | 0.99             | 1.33e-53              |
| 11:34104213                        | rs75212444  | T      | 0.88       | 482,788     | 0.20             | 2.35e-13              |
| 12:118926685                       | rs7298104   | T      | 0.91       | 475,771     | 0.93             | 5.97e-10              |
| 19:53535248                        | rs116890400 | A      | 0.88       | 485,047     | 0.51             | 1.02e-11              |
| 21:18068575                        | rs73196350  | A      | 0.94       | 479,137     | 0.76             | 5.19e-10              |

553  
 554

555 **Table 2. Best sex chromosome sequence match for genome-wide significant variant**  
 556 **probes.** Variants with genome-wide significant associations with genetic sex are reported with  
 557 GWAS p-value (P-value) and the matched sex chromosome region (Matched Sex  
 558 Chromosome) with the highest BLAT score (BLAT score). The sequence similarity and length of  
 559 the matching region (Match Length) are also reported.

560

| Dataset | SNP ID      | Location (chr:position) | P-value  | Matched Sex Chromosome | BLAT Score | Sequence Similarity (%) | Match Length (bp) |
|---------|-------------|-------------------------|----------|------------------------|------------|-------------------------|-------------------|
| BioVU   | rs9870157   | 3: 16652240             | 2.82E-83 | Y: 26964471-26964521   | 46         | 96.0                    | 50                |
| BioVU   | rs145369881 | 7: 100351596            | 3.25E-8  | X: 26864979-2685116    | 39         | 90.0                    | 50                |
| BioVU   | rs77638744  | 7: 121147858            | 1.52E-10 | Y: 23315613-23316169   | 45         | 98.0                    | 50                |
| BioVU   | rs9508454   | 13: 20119336            | 1.26E-31 | Y: 28612640-28612689   | 46         | 91.9                    | 50                |
| BioVU   | rs1048990   | 14: 35761675            | 1.94E-20 | Y: 15398460-15398510   | 46         | 96.0                    | 50                |
| UKBB    | rs75745570  | 1: 162075684            | 7.60E-14 | X: 121952043-121952114 | 57         | 90.2                    | 71                |
| UKBB    | rs114928327 | 4: 88457099             | 4.09E-22 | X: 79084149-79084223   | 60         | 93.0                    | 71                |
| UKBB    | rs11598874  | 10: 39006198            | 1.94E-12 | Y: 13568059-13568130   | 67         | 97.2                    | 71                |
| UKBB    | rs11032483  | 11: 4515024             | 1.33E-53 | Y: 19070733-19070803   | 48         | 84.3                    | 70                |
| UKBB    | rs75212444  | 11: 34104213            | 2.35E-13 | X: 36967486-36967536   | 46         | 96.0                    | 50                |
| UKBB    | rs7298104   | 12: 118926685           | 5.97E-10 | Y: 1513524-1513899     | 43         | 93.9                    | 59                |
| UKBB    | rs116890400 | 19: 53535248            | 1.02E-11 | X: 38605892-38605963   | 57         | 90.2                    | 71                |
| UKBB    | rs73196350  | 21: 18068575            | 5.19E-10 | X: 80780038-80780101   | 49         | 88.9                    | 63                |

561  
562

563 **Figure 1**

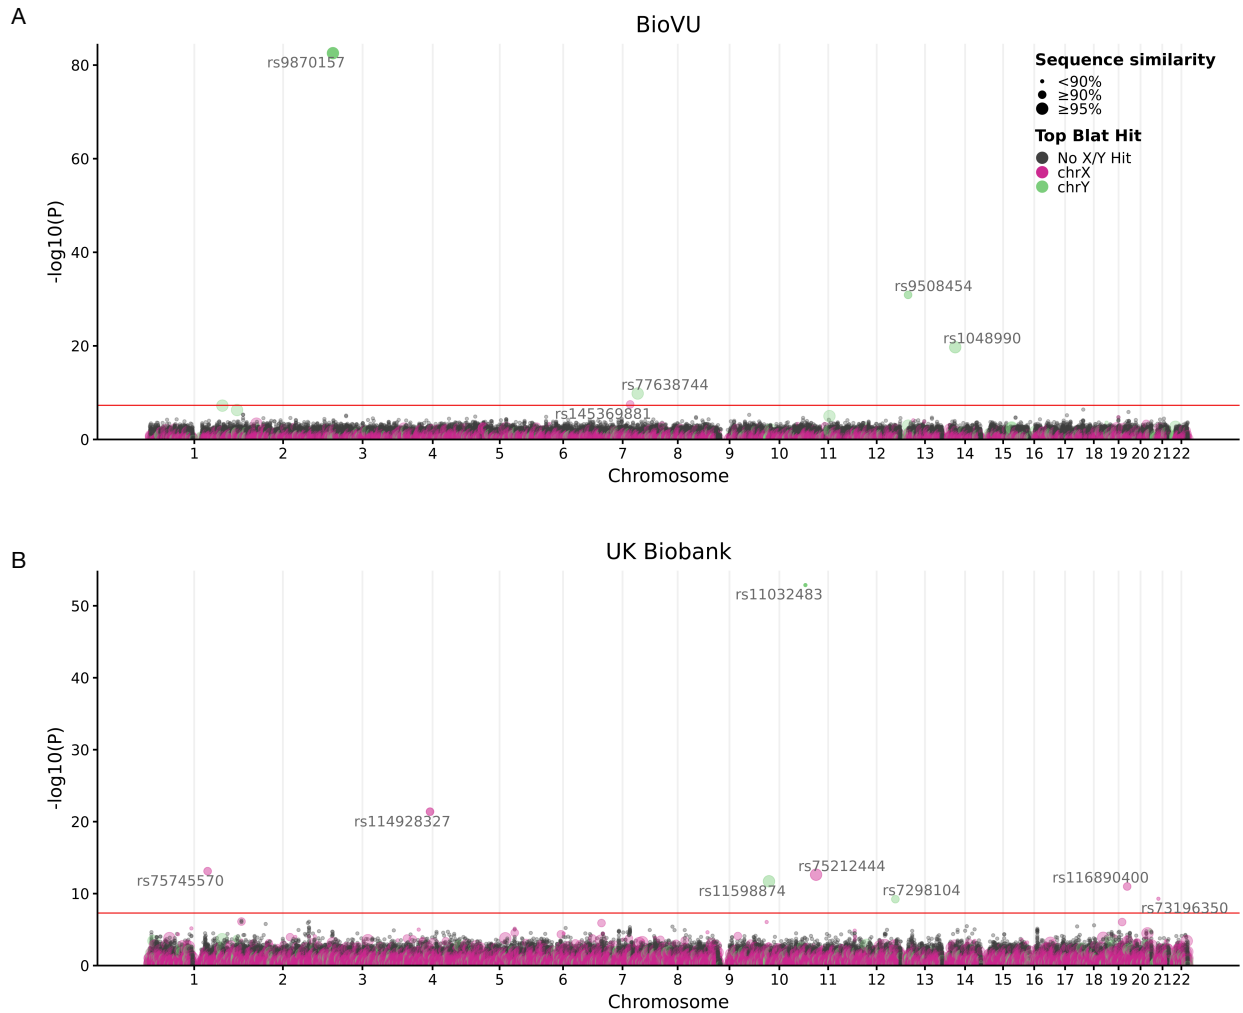

564  
565

566 **Figure 1. Genome-wide association tests for genetic sex reveals candidate variants for**  
567 **sexually antagonistic selection.** To identify candidate variants for sexually antagonistic  
568 selection, we performed genome-wide association tests between females (cases) and males  
569 (controls) in two large biobank cohorts: **(A)** BioVU (females = 34,269, males = 27,491) and **(B)**  
570 UK Biobank (females = 264,813, males = 223,478). After standard quality control and sex-  
571 specific missingness filters (Methods), we identified five variants with genome-wide statistically  
572 significant associations ( $P < 5E-8$ , solid red line) in BioVU and eight in the UK Biobank. None of  
573 the significant variants in BioVU and UK Biobank replicated at genome-wide or nominal  
574 significance ( $P < 0.05$ ) across the two cohorts (Table 1). The probe sequence for each  
575 associated variant (except rs11032483) had  $>90\%$  sequence identity to at least one sequence  
576 on a sex chromosome (Table 2). Each point represents one variant. Each variant is colored by  
577 whether the best match of its probe sequence to a sex chromosome (according to BLAT score)  
578 is on X (pink) or Y (green). If it has no strong match to either sex chromosome it is colored  
579 black. The size of each point indicates the degree of sequence similarity.

580

581 **Figure 2**

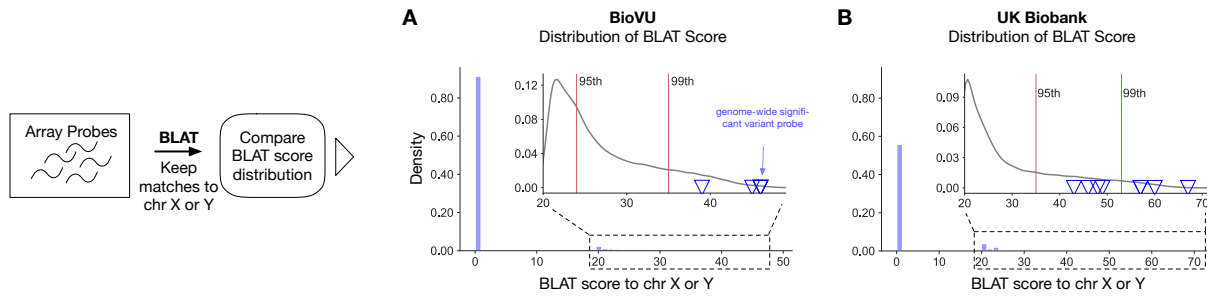

582  
583

584 **Figure 2. Probes for autosomal variants associated with genetic sex show high sequence**  
585 **similarity to sex chromosomes.** We searched probe sequences used to genotype autosomal  
586 variants in the BioVU (798,051 autosomal probes) and UK Biobank (620,040 autosomal probes)  
587 cohorts for high sequence similarity to sex chromosome regions using BLAT (Methods). **(A)**  
588 More than 80% of BioVU autosomal probes do not have any sequence similarity (BLAT score  $\leq$   
589 20) to a sex chromosome region; these are plotted at 0. Among the 83,083 BioVU probes with  
590 similarity to a sex chromosome sequence (inset), the probes for the variants with genome-wide  
591 significant associations with sex (blue triangles) are all in the tail of the distribution beyond the  
592 99<sup>th</sup> percentile of the BLAT match score. **(B)** Patterns are similar for the UK Biobank probes;  
593 however, a higher fraction (20%, 128,090) have detectable similarity to a sex chromosome,  
594 likely due to their greater length than the BioVU probes.

595  
596

597 **Figure 3**

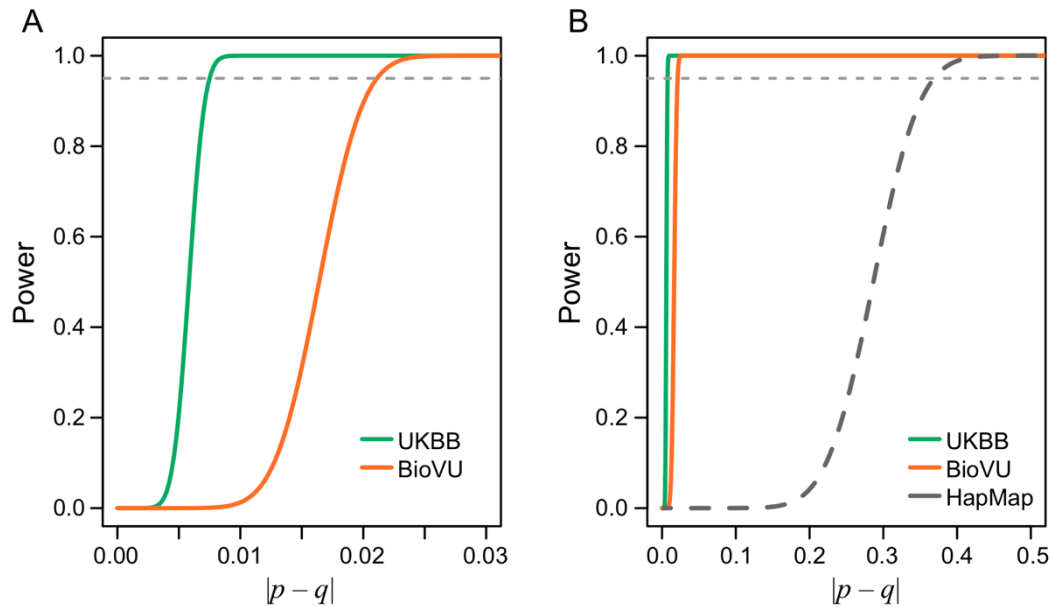

598  
599

600 **Figure 3. Statistical power was sufficient to detect small allelic divergence between the**  
601 **sexes. (A)** The power to detect different levels of allelic divergence between the sexes was  
602 calculated for the BioVU (blue) and UKBB (green) cohorts. The dashed line shows the 95%  
603 power threshold. **(B)** Statistical power for the analyzed cohorts compared to previous analysis of  
604 human sequences (Lucotte *et al.* 2016) based on approximately 100 individuals per HapMap  
605 population (gray).  
606



607 **SUPPLEMENTARY FILES**

608

609 **Supplementary File 1:** “TableS1\_gwas\_significant\_hits.xlsx” - Summary statistics for genome-  
610 wide significant variants (including those removed for uneven missing rate between the sexes)  
611 associated with genetic sex in BioVU and UK Biobank. MALE\_HOM1, MALE\_HET, and  
612 MALE\_HOM2 are the counts of genotypes of the minor allele homozygote, heterozygote, and  
613 major allele homozygote genotype calls in males, respectively; MALE\_MISSING is the number  
614 of missing genotypes in males reported by plink. FEM\_ prefixes similar columns for females.  
615 MISSING\_PVAL gives the p-value from Fisher’s exact test comparing proportions of missing  
616 genotypes between males and females as reported by plink. HOM1\_PVAL gives the p-value for  
617 a binomial test for the proportion of minor allele homozygotes (of either sex) being equal to the  
618 marginal allele frequency squared. OR, STAT and ASSOC\_PVAL gives the maximum odds  
619 ratio, t-statistic and p-value from logistic regression as described in the text.

620

621 **Supplementary File 2:** “TableS2\_HWE\_genotype\_counts.xlsx” - Genome-wide significant  
622 variants associated with genetic sex in BioVU and UK Biobank with Hardy-Weinberg Equilibrium  
623 statistics.

624

625 **Supplementary File 3:** “TableS3\_raw\_blat\_xy\_hits\_bv.tsv” - Raw BLAT results for hits to  
626 chromosome X or Y for probes in the MEGAex genotyping array.

627

628 **Supplementary File 4:** “TableS4\_raw\_blat\_xy\_hits\_ukaxiom.tsv” - Raw BLAT results for hits to  
629 chromosome X or Y for probes in the UK Biobank Axiom genotyping array.

630

631 **Supplementary File 5:** “TableS5\_raw\_blat\_xy\_hits\_ukbil.tsv” - Raw BLAT results for hits to  
632 chromosome X or Y for probes in the UK BiEVE genotyping array.

633

634 **Supplementary File 6:** “TableS6\_best\_blat\_score\_xy\_hit\_length\_filtered\_bv\_gwas.tsv” - Best  
635 BLAT matches to chromosome X or Y based on highest BLAT score for each probe in the  
636 MEGAex genotyping array.

637

638 **Supplementary File 7:** “TableS7\_best\_blat\_score\_xy\_hit\_length\_filtered\_uk\_gwas.tsv” - Best  
639 BLAT matches to chromosome X or Y based on highest BLAT score for each probe in the UK  
640 Biobank. BLAT results for hits to chromosome X or Y for probes are chosen after pooling across  
641 UK Biobank Axiom and UK BiEVE genotyping arrays.

642

643 **Supplementary File 8:** “TableS8\_uk\_var\_w\_missingness\_best\_blat\_score\_xy.tsv” – Best sex  
644 chromosome match based on highest BLAT score for UK Biobank genome-wide significant  
645 variants with statistically significant difference in missing rate between females and males.

646

647 **Supplementary File 9:** “FileS9\_mortality\_selection\_derivation.pdf” – Mathematical derivation  
648 for estimating the sex-specific mortality cost.

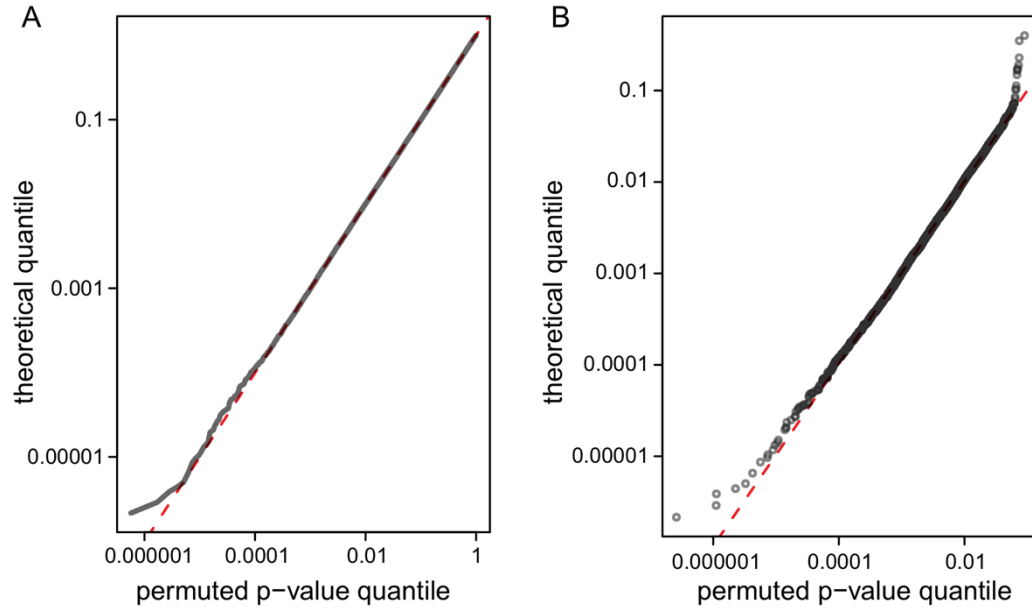

649  
650

651 **Supplementary Figure 1. Permutation of genetic sex to generate a null distribution**  
652 **demonstrates that p-values are well calibrated.** We randomly permuted genetic sex and ran  
653 a genome-wide association test between the permuted females and males in the UKBB cohort  
654 100 times. Only those variants with a p-value < 0.01 under the association with the true genetic  
655 sex are considered (n = 8,868 SNPs). **(A)** Q-Q plot of all the permuted variants shows they are  
656 uniformly distributed. **(B)** Permuted variants are uniformly distributed even at very small p-  
657 values.

658

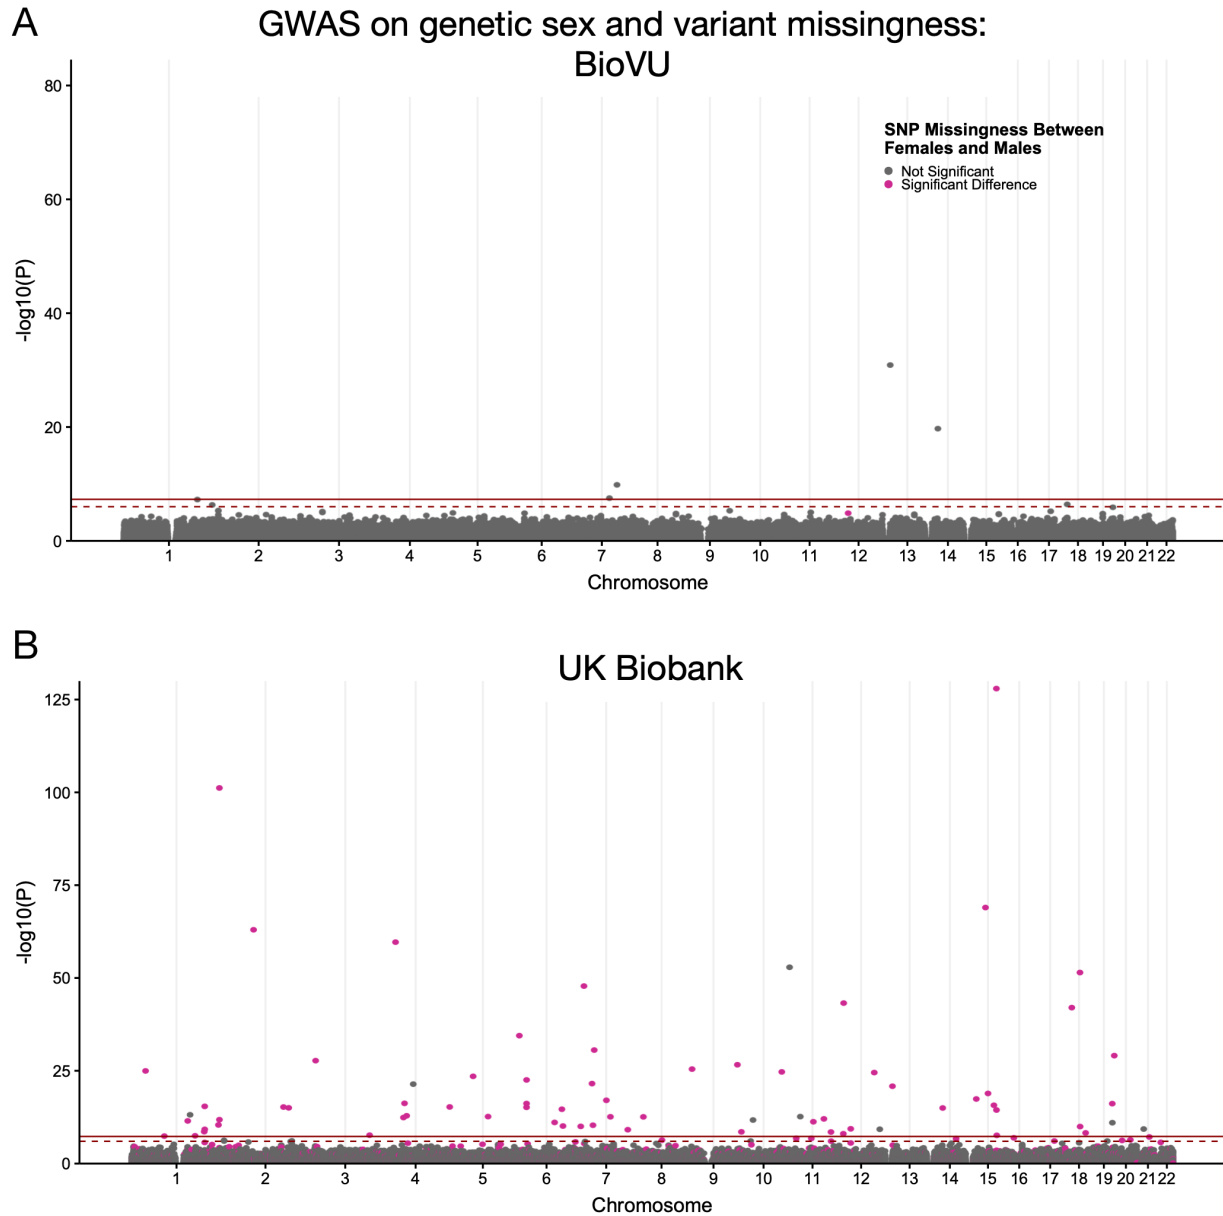

659

660

661 **Supplementary Figure 2. Significantly different variant missingness between females and**  
662 **males contribute many spurious association in the UK Biobank GWAS for genetic sex.**

663 After running a GWAS for genetic sex in (A) BioVU and (B) UK Biobank cohorts, we identify five  
664 and 72 variants with genome-wide significant associations (solid red line,  $P < 5E-8$ ; dashed red  
665 line  $P < 5E-6$ ) respectively. Variants with a statistically significant difference ( $p < 0.00001$ ,  
666 Fisher's Exact test) in the missing rate between females and males are colored in red. In the UK  
667 Biobank cohort, 64 genome-wide significant variants also have a statistically significant  
668 difference in the missingness between cases and control, suggesting that these associations  
669 are spurious.

670

671

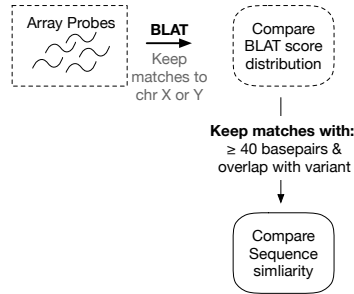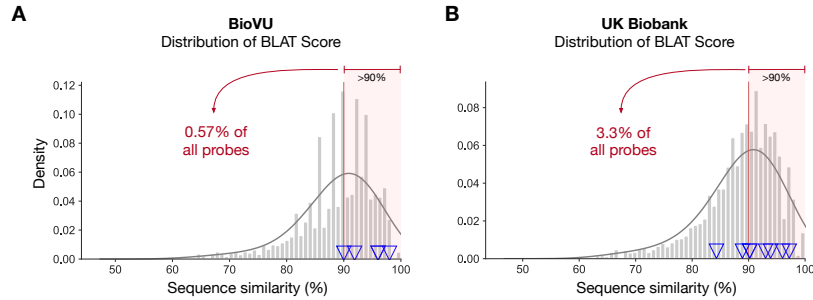

672  
673  
674  
675  
676  
677  
678  
679  
680  
681

**Supplementary Figure 3. Sequence similarity distribution of probes after applying strict matching criteria to a sex chromosome.** To identify probes most likely to mis-hybridize between autosomal and sex chromosome sequences, we filtered those whose best BLAT match met the following criteria in (A) BioVU and (B) UK Biobank: sex chromosome match  $\geq 40$  base pairs in length,  $\geq 90\%$  sequence similarity, and overlap of the matching region with the genotyped variant. Out of all autosomal probes, 0.57% and 3.3% met the aforementioned criteria in BioVU and UK Biobank, respectively.

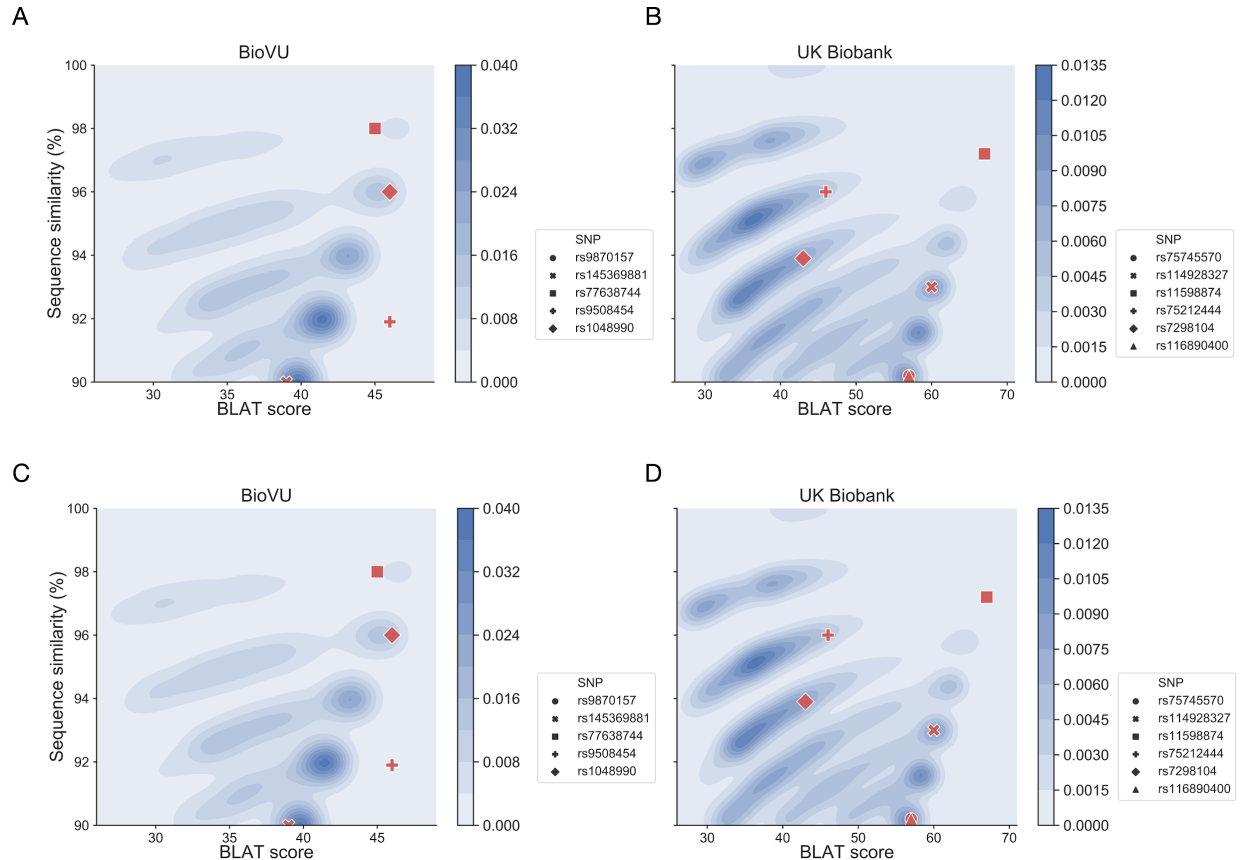

682  
683

684 **Supplementary Figure 4. Probes of genome-wide significant variants with a match to sex**  
685 **chromosome regions have similar matching properties as non-significant variant when**  
686 **comparing BLAT score and match length to sequence similarity.** Using BLAT, we identify  
687 array probe sequences with high sequence similarity ( $\geq 90\%$ ) to a sex chromosome region, have  
688 a match length  $\geq 40$  base pairs, and overlap or is adjacent on the probe sequence to the variant  
689 being genotyped. We plot bivariate kernel density estimates comparing (A) BLAT score and (B)  
690 match length against sequence similarity (y-axis) for BioVU and UK Biobank probe sequences.  
691 Darker blue represents areas of higher density. The position of probe sequences for genome-  
692 wide significant variants are overlaid as red markers on each plot. Comparing against the  
693 densities of the non-significant variants, probes of genome-wide significant variants occur in  
694 areas of high density suggesting they have similar matching properties as non-significant  
695 probes.
